# Supplementary material for: Flexible and stretchable chromatic fibers with high sensing reversibility
Source: PubMed Central journal article supplement (PMC6020123; doi:10.1039/c6sc00414h), 2016-04-14
Supplement: SC-007-C6SC00414H-s001.pdf [file SC-007-C6SC00414H-s001.pdf]

## Supplementary Information

### Flexible and Stretchable Chromatic Fibers with High Sensing Reversibility

*Xin Lu, Zhidong Zhang, Xuemei Sun\*, Peining Chen, Jing Zhang, Hui Guo,  
Zhengzhong Shao\* and Huisheng Peng*

*State Key Laboratory of Molecular Engineering of Polymers, Department of  
Macromolecular Science, and Laboratory of Advanced Materials, Fudan University,  
Shanghai 200438, China; E-mail: sunxm@fudan.edu.cn, zzshao@fudan.edu.cn.*

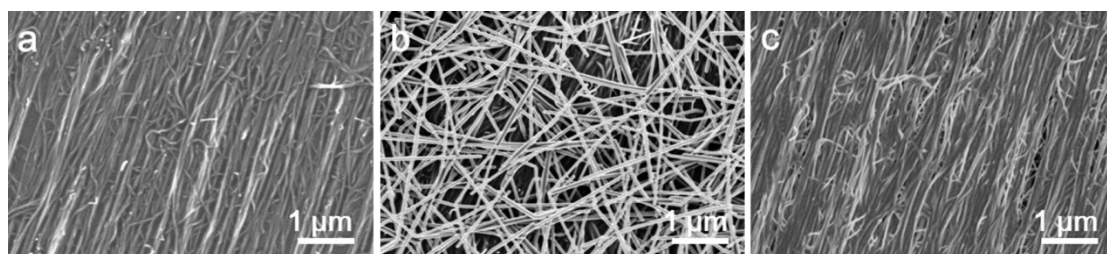

**Fig. S1** SEM images of the surface of the conductive fiber during preparation. **a.** The inner CNT layer. **b.** The middle silver nanowire. **c.** The outer CNT layer.

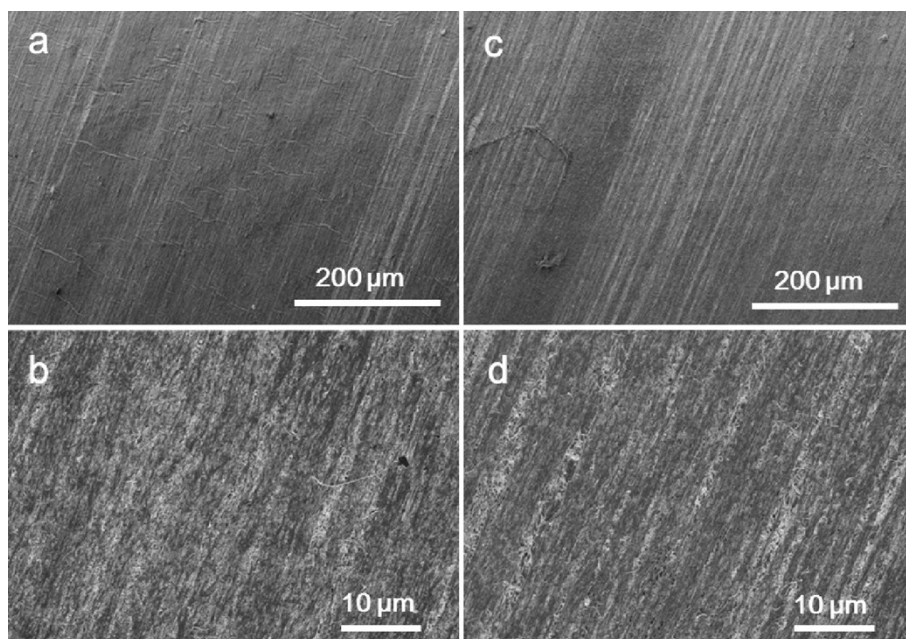

**Fig. S2** SEM images of the elastic conductive fiber after stretching at different magnifications. **a** and **b**. Original state without stretching. **c** and **d**. After stretching (strain of 50%) for 1,000 cycles.

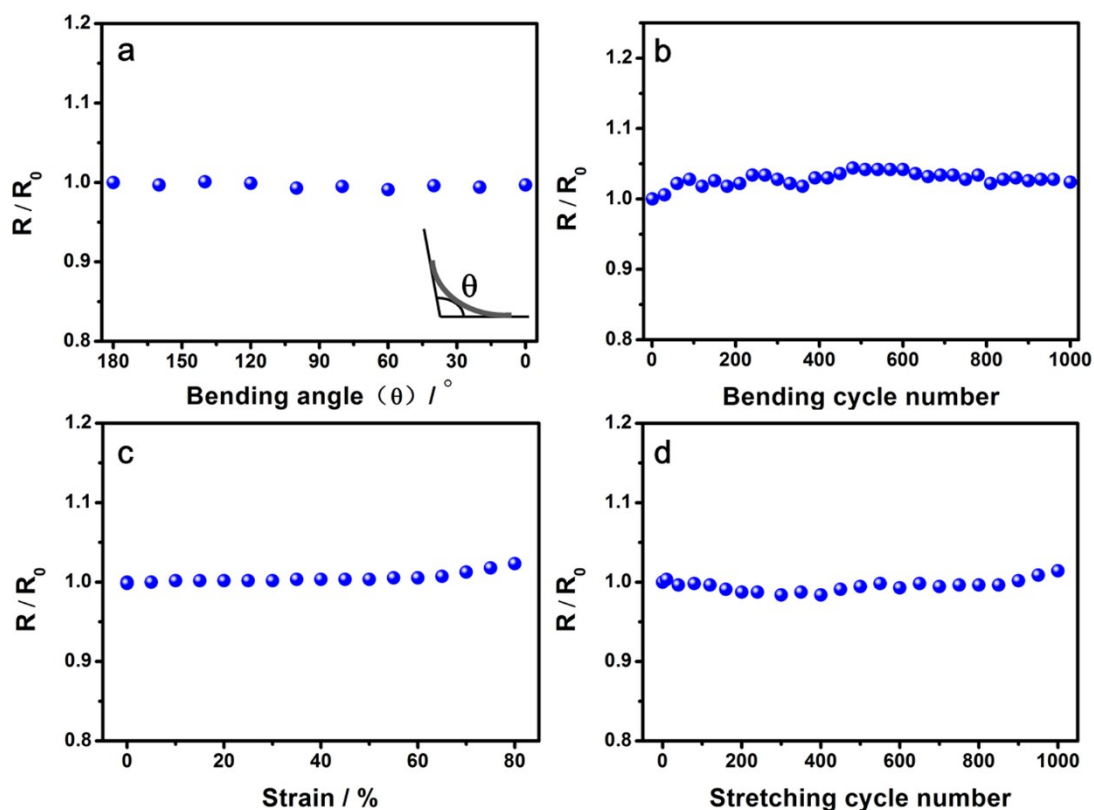

**Fig. S3** Electrical property of the conductive fiber before and after bending or stretching. **a.** Dependence of resistance ratio on bending angle. **b.** Dependence of resistance on bending cycle number (with a bending angle of  $90^\circ$ ). **c.** Dependence of resistance ratio on strain. **d.** Dependence of resistance ratio on stretching cycle number (with a strain of 50%). Here  $R_0$  and  $R$  correspond to the resistances before and after bending or stretching, respectively.

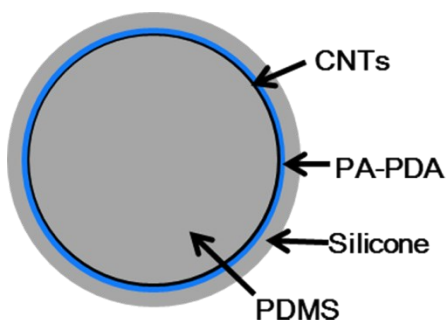

**Fig. S4** Schematic illustration for the cross-sectional structure of the electrothermal chromatic fiber.

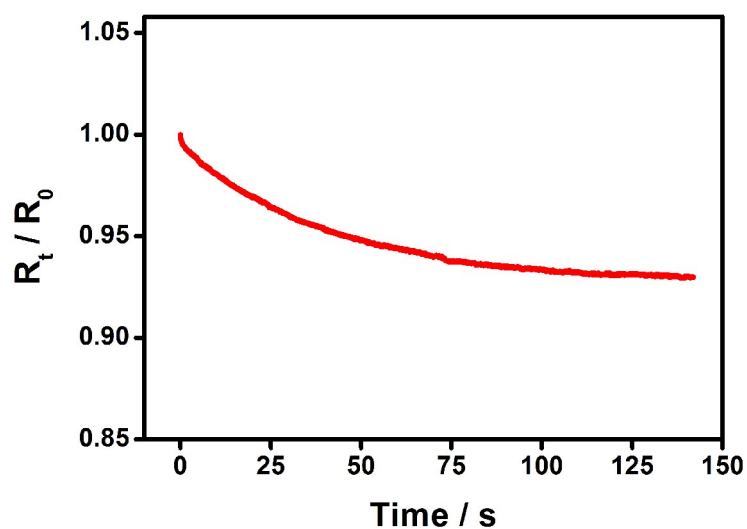

**Fig. S5** The evolution of the resistance with time for the composite fiber at a current of 8.1 mA.

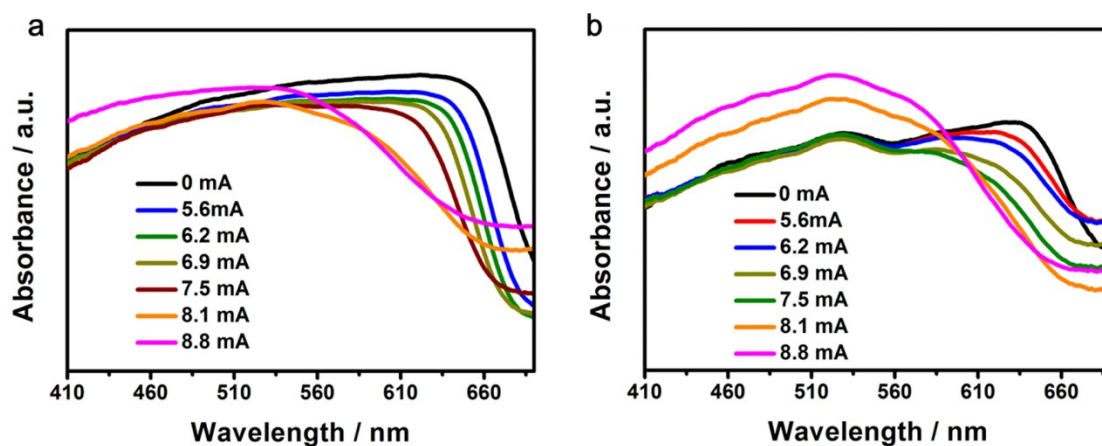

**Fig. S6** Electrothermal chromatic performance of the fiber. **a.** UV-vis spectra of the fiber with increasing electric currents at the first cycle. **b.** UV-vis spectra of the fiber at increasing electric currents at the second reversible cycle.

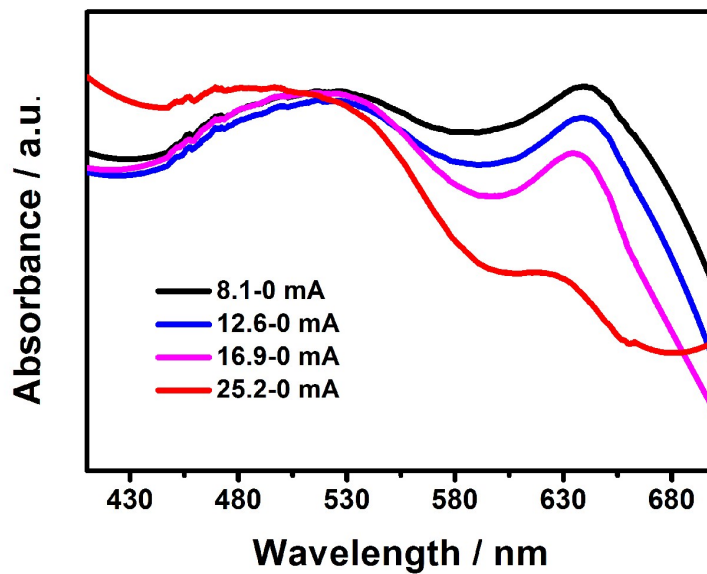

**Fig. S7** UV-vis spectra of the electrothermal chromatic fiber after passing with currents of 8.1, 12.6, 16.9 and 25.2 mA.

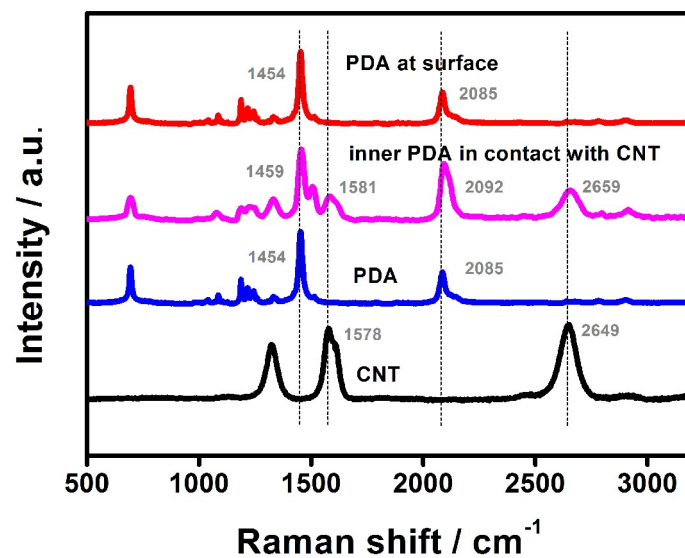

**Fig. S8** Raman spectra of different locations in the composite PDA/CNT fiber in comparison to the bare CNT and bare PDA.

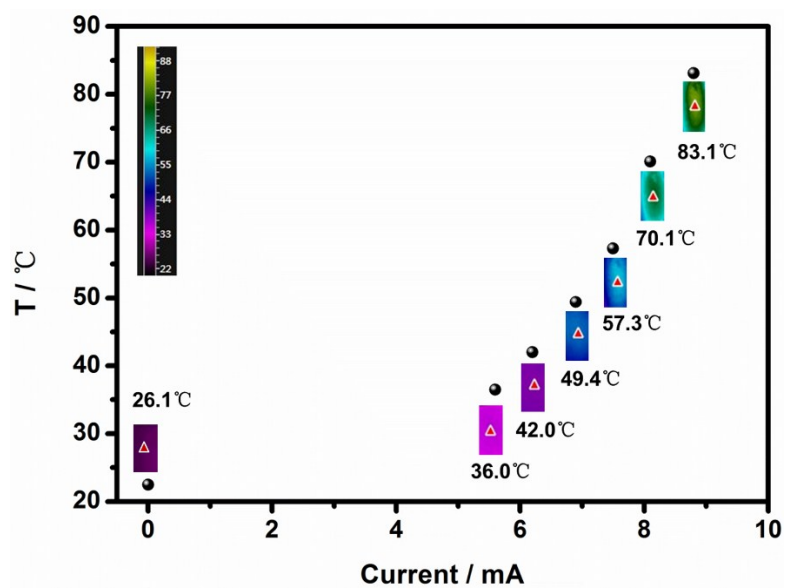

**Fig. S9** Temperatures of the composite fiber with increasing electric currents.

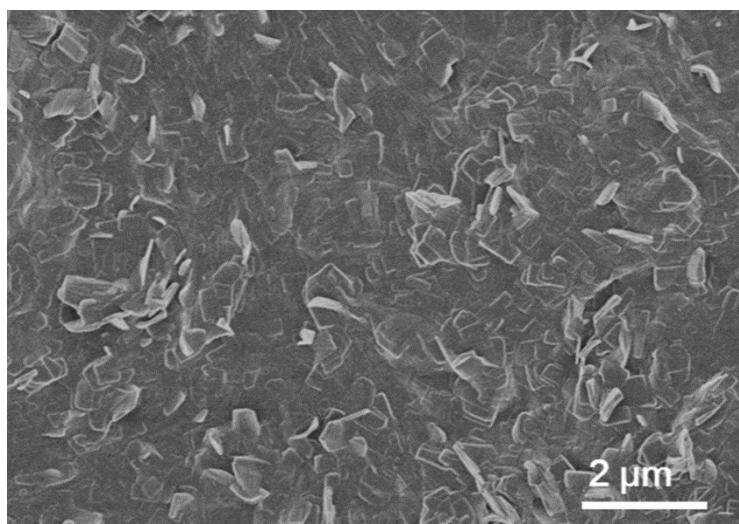

**Fig. S10** Morphology transition of bare PDA after a heating and cooling process.

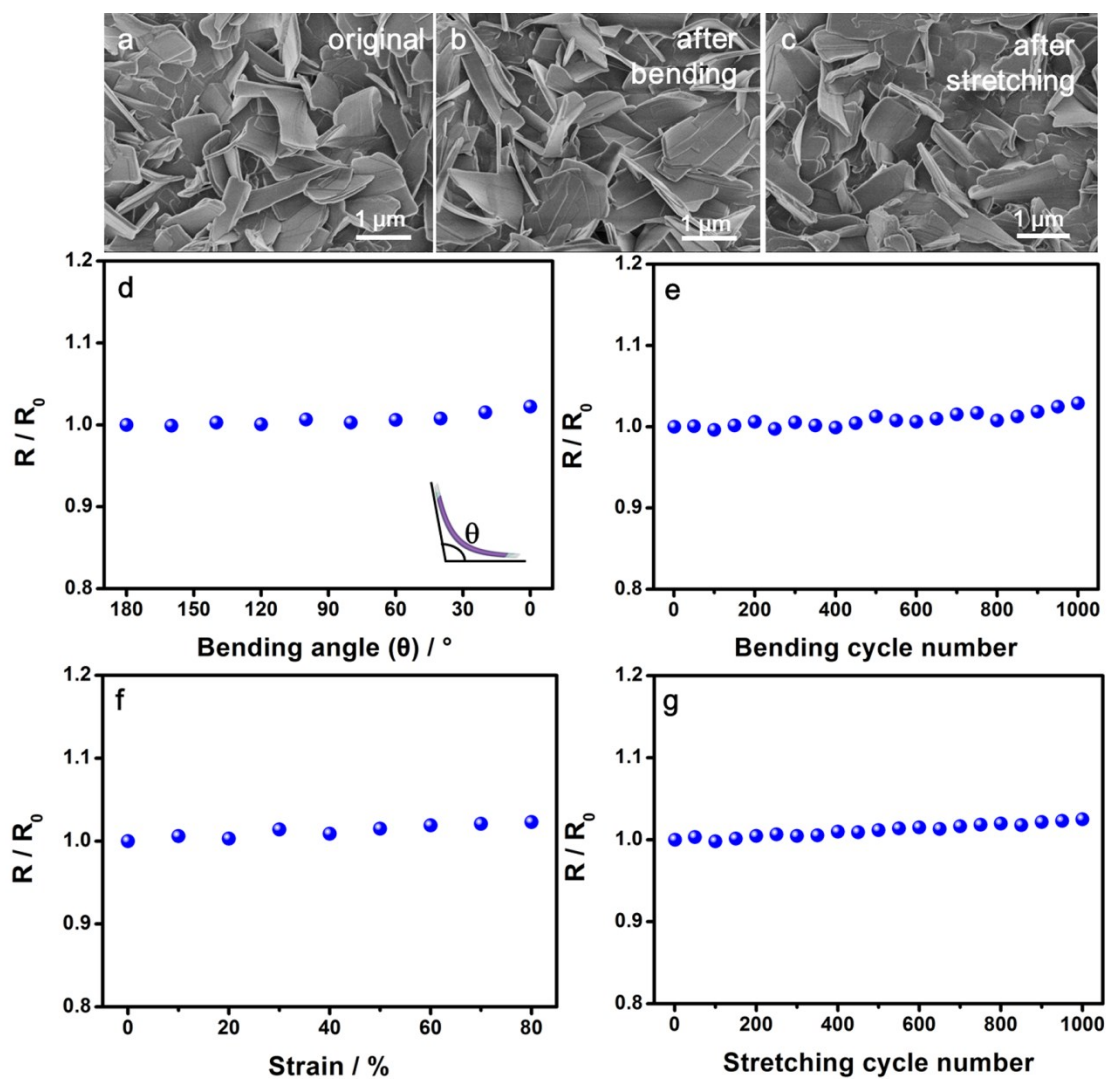

**Fig. S11** The evolution in morphology and electrical property of the electrothermal chromatic fiber before and after bending or stretching. **a.** SEM image of an as-synthesized composite fiber. **b.** SEM image after bending. **c.** SEM image after stretching. **d.** Dependence of resistance ratio on bending angle. **e.** Dependence of resistance ratio on bending cycle number (with a bending angle of  $90^\circ$ ). **f.** Dependence of resistance ratio on stretching. **g.** Dependence of resistance ratio on stretching cycle number (with a strain of 50%). Here  $R_0$  and  $R$  correspond to the resistances before and after bending or stretching, respectively.

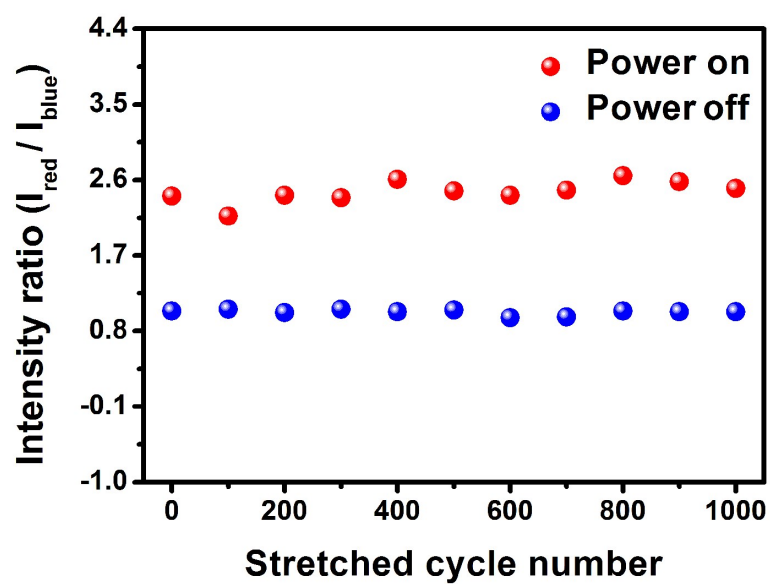

**Fig. S12** Intensity ratio of red to blue peaks for a composite fiber being stretched by 50% for 1,000 cycles. The data were collected from UV-vis spectra.

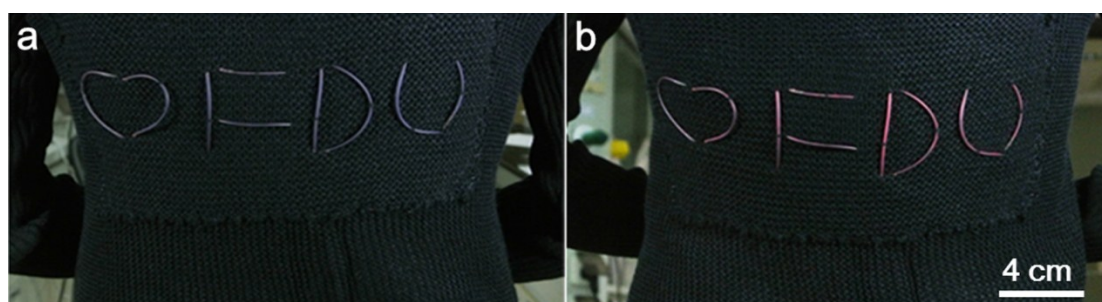

**Fig. S13** Electrothermal chromatic fibers being woven into a sweater to display different colors.
